# Supplementary material for: Steric and electronic effects on arylthiolate coordination in the pseudotetrahedral complexes [(TpPh,Me)Ni–SAr] (TpPh,Me= hydrotris{3-phenyl-5-methyl-1-pyrazolyl}borate)
Source: Royal Society of Chemistry journal article supplement (doi:10.1039/c4dt02726d), 2014-01-01
Supplement: c4dt02726d1.pdf [file c4dt02726d1.pdf]

## Electronic Supplementary Information

### **Steric and electronic effects on arylthiolate coordination in the pseudotetrahedral complexes [(Tp<sup>Ph,Me</sup>)Ni-SAr] (Tp<sup>Ph,Me</sup> = hydrotris{3-phenyl-5-methyl-1-pyrazolyl}borate)**

Tapash Deb,<sup>a</sup> Caitlin M. Anderson,<sup>a</sup> Swarup Chattopadhyay,<sup>a</sup> Huaibo Ma,<sup>a</sup> Victor G. Young, Jr.<sup>b</sup>  
and Michael P. Jensen<sup>a,\*</sup>

<sup>a</sup>*Department of Chemistry and Biochemistry, Ohio University, Athens, Ohio 45701, USA and*

<sup>b</sup>*X-ray Crystallographic Laboratory, Department of Chemistry, University of Minnesota, Minneapolis, Minnesota 55455, USA.*

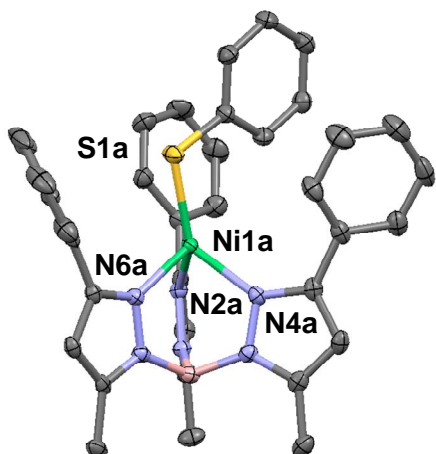

**Figure S1.** Thermal ellipsoid plot (50% probability) of  $[(\text{Tp}^{\text{Ph,Me}})\text{Ni-SPh}]$ . Hydrogen atoms are omitted for clarity. Relevant bond lengths for  $[(\text{Tp}^{\text{Ph,Me}})\text{Ni-SPh}]$  (Å): Ni1a–N2a, 2.005(2); Ni1a–N4a, 2.019(2); Ni1a–N6a, 2.013(2); Ni1a–S1a, 2.2224(7). Relevant bond angles for  $[(\text{Tp}^{\text{Ph,Me}})\text{Ni-SPh}]$  (°): N2a–Ni1a–N4a, 90.61(8); N2a–Ni1a–N6a, 91.66(8); N4a–Ni1a–N6a, 92.86(8); N2a–Ni1a–S1a, 129.21(6); N4a–Ni1a–S1a, 131.42(6); N6a–Ni1a–S1a, 109.85(6); Ni1a–S1a–C31a, 106.63(8).

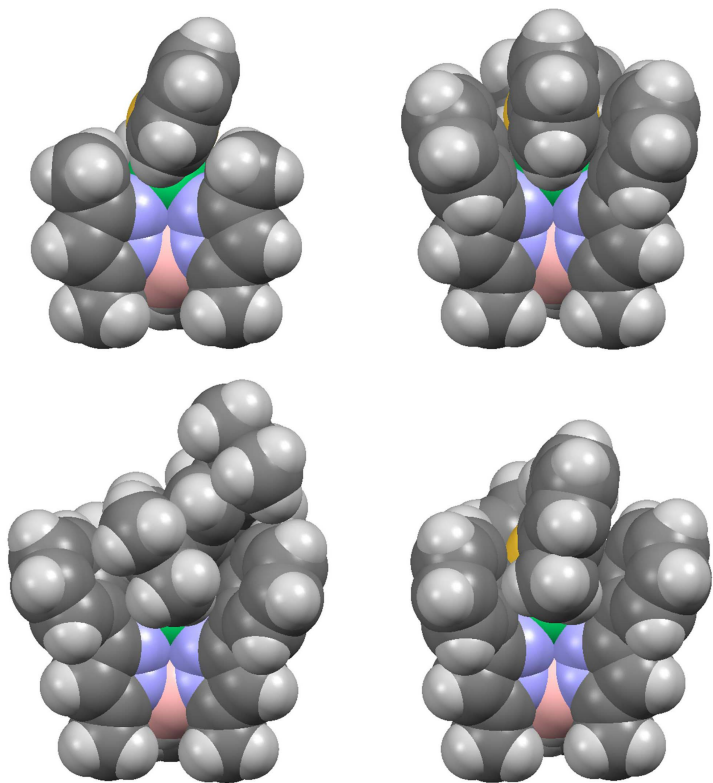

**Figure S2.** Space-filling diagrams (clockwise from top left) of  $[(\text{Tp}^{\text{Me,Me}})\text{Ni-SPh}]$ ,  $[(\text{Tp}^{\text{Ph,Me}})\text{Ni-SPh}]$ ,  $[(\text{Tp}^{\text{Ph,Me}})\text{Ni-S-2,6-Me}_2\text{C}_6\text{H}_3]$  and  $[(\text{Tp}^{\text{Ph,Me}})\text{Ni-S-2,4,6-}i\text{Pr}_3\text{C}_6\text{H}_2]$ .

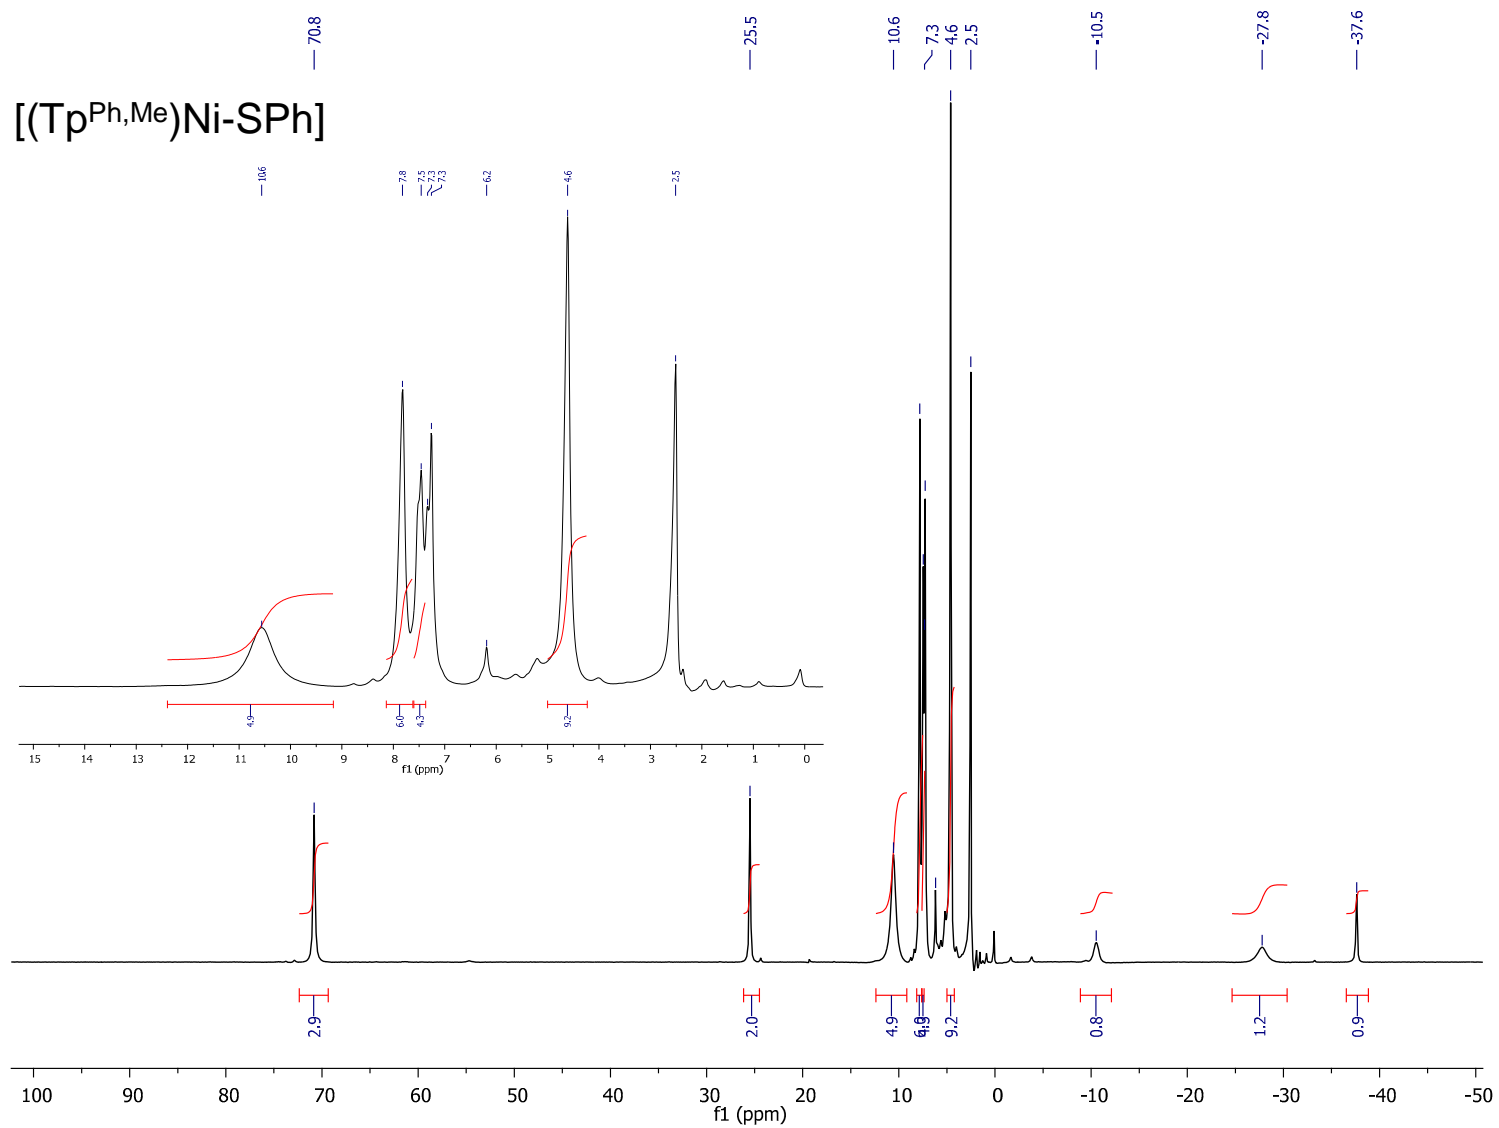

**Figure S3.** <sup>1</sup>H NMR spectrum (500 MHz, 295 K) of [(Tp<sup>Ph,Me</sup>)Ni-SPh] in CDCl<sub>3</sub>.

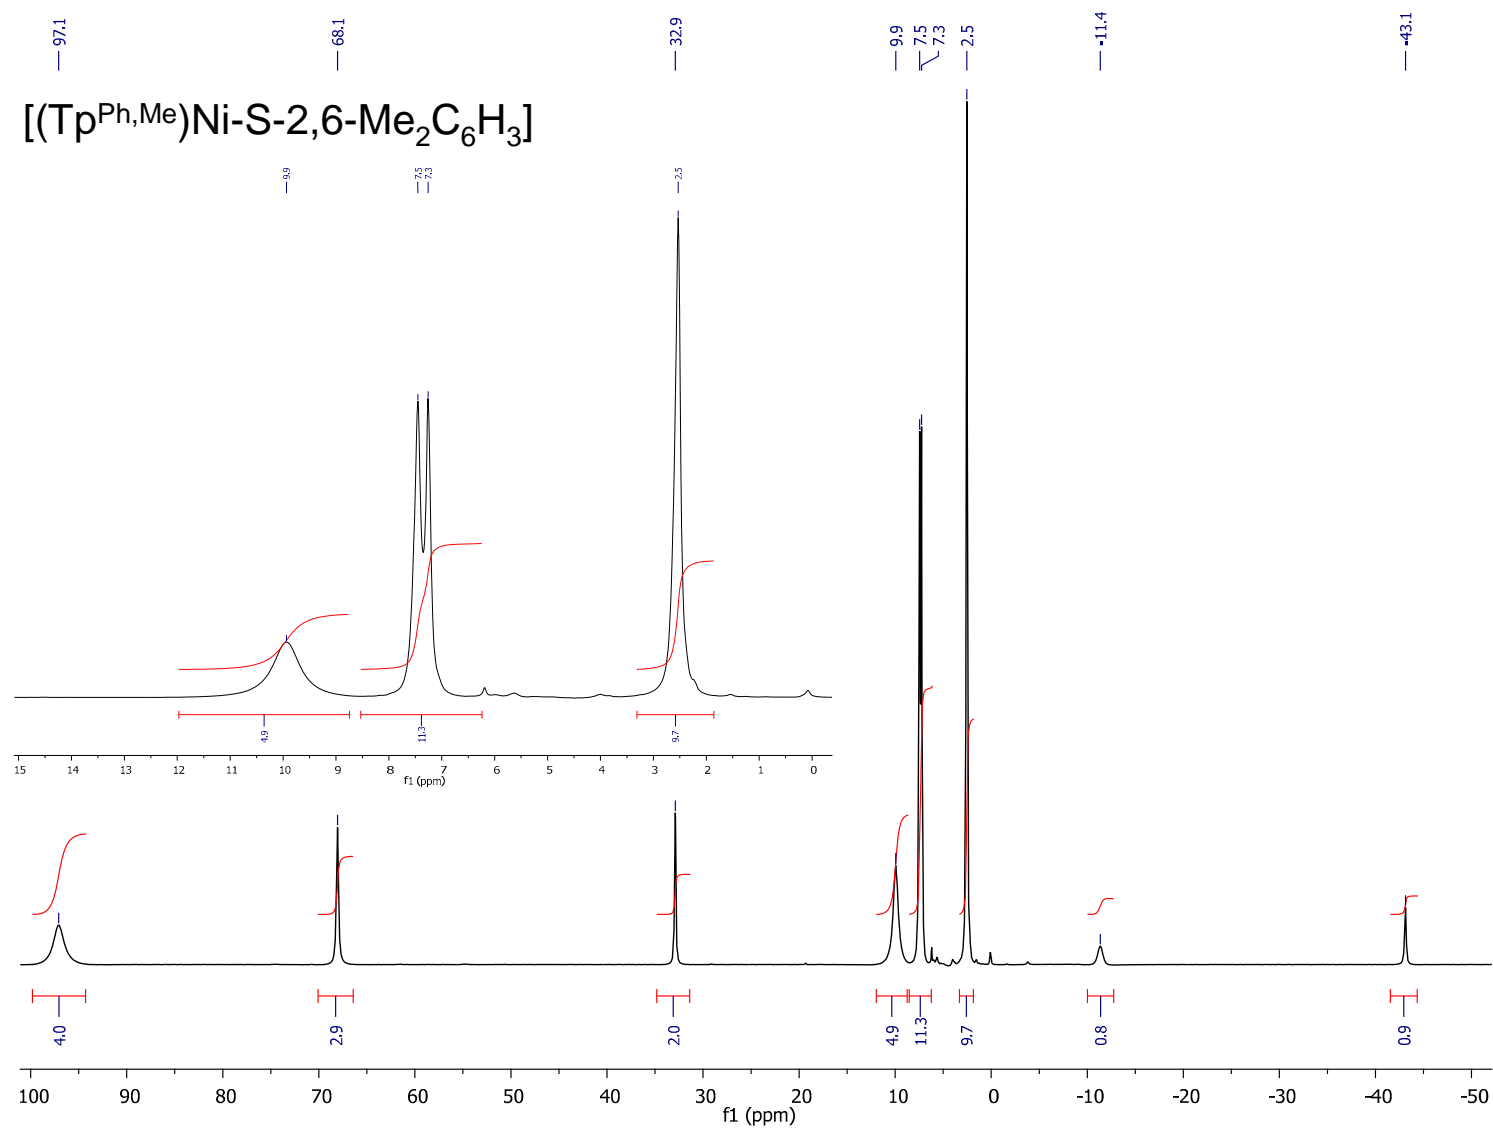

**Figure S4.**  $^1\text{H}$  NMR spectrum (500 MHz, 295 K) of  $[(\text{Tp}^{\text{Ph,Me}})\text{Ni-S-2,6-Me}_2\text{C}_6\text{H}_3]$  in  $\text{CDCl}_3$ .

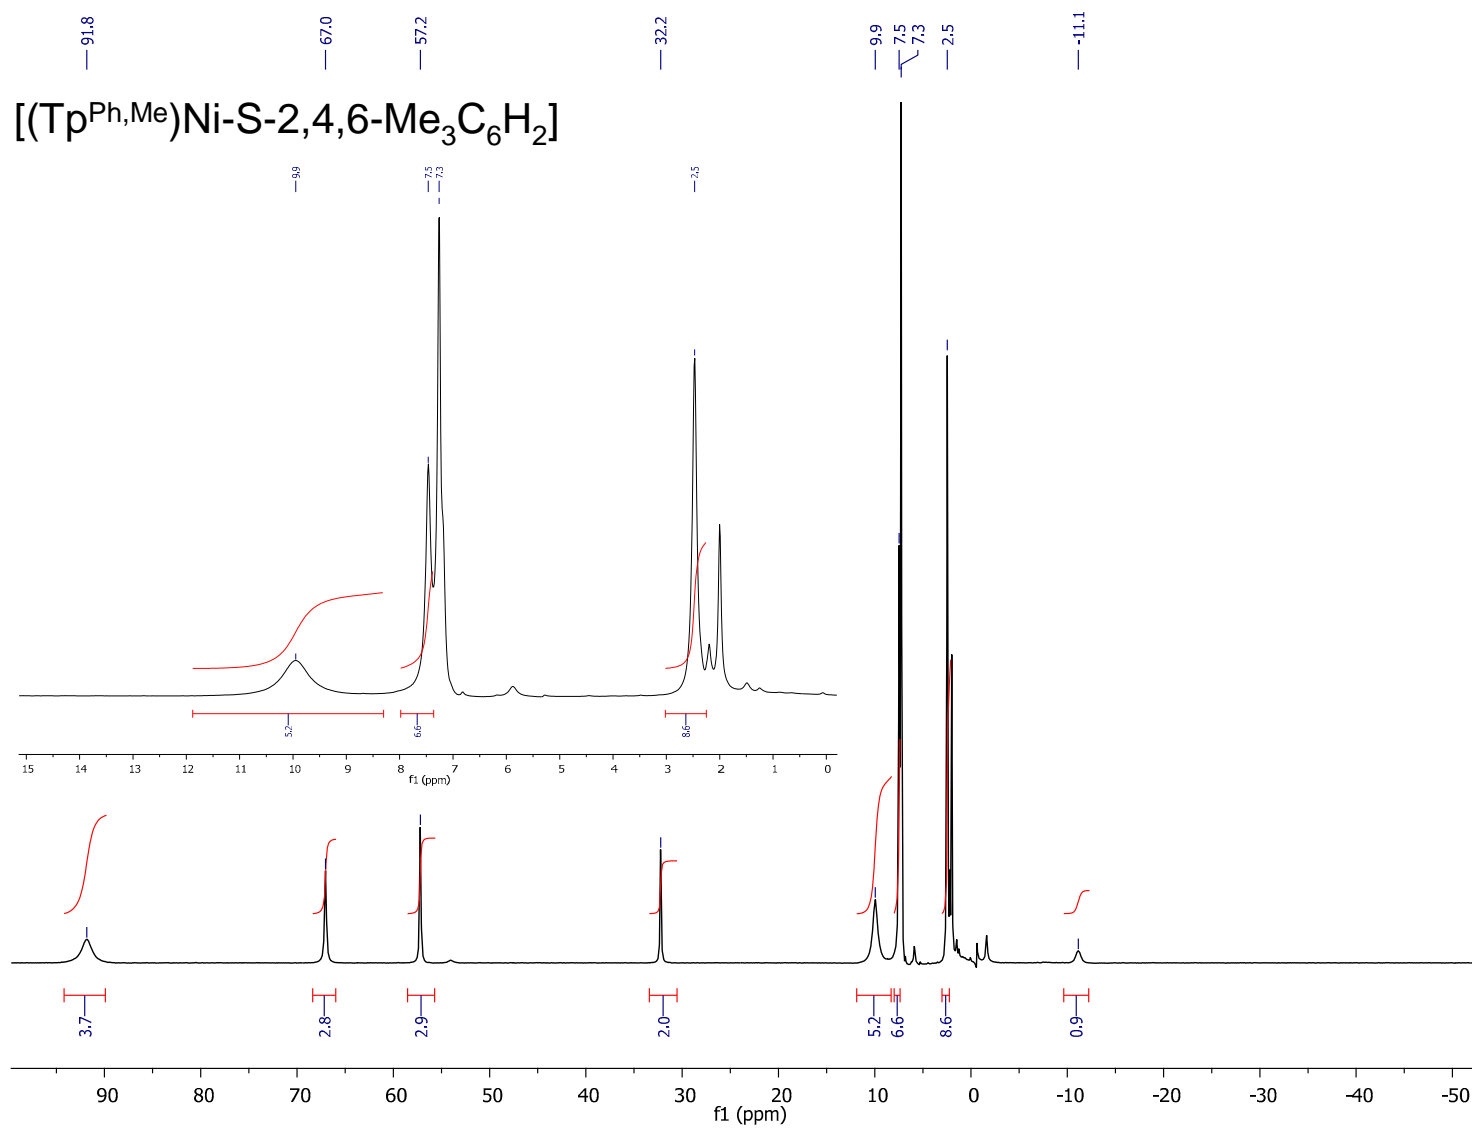

**Figure S5.**  $^1\text{H}$  NMR spectrum (500 MHz, 295 K) of  $[(\text{Tp}^{\text{Ph,Me}})\text{Ni-S-2,4,6-Me}_3\text{C}_6\text{H}_2]$  in  $\text{CDCl}_3$ .

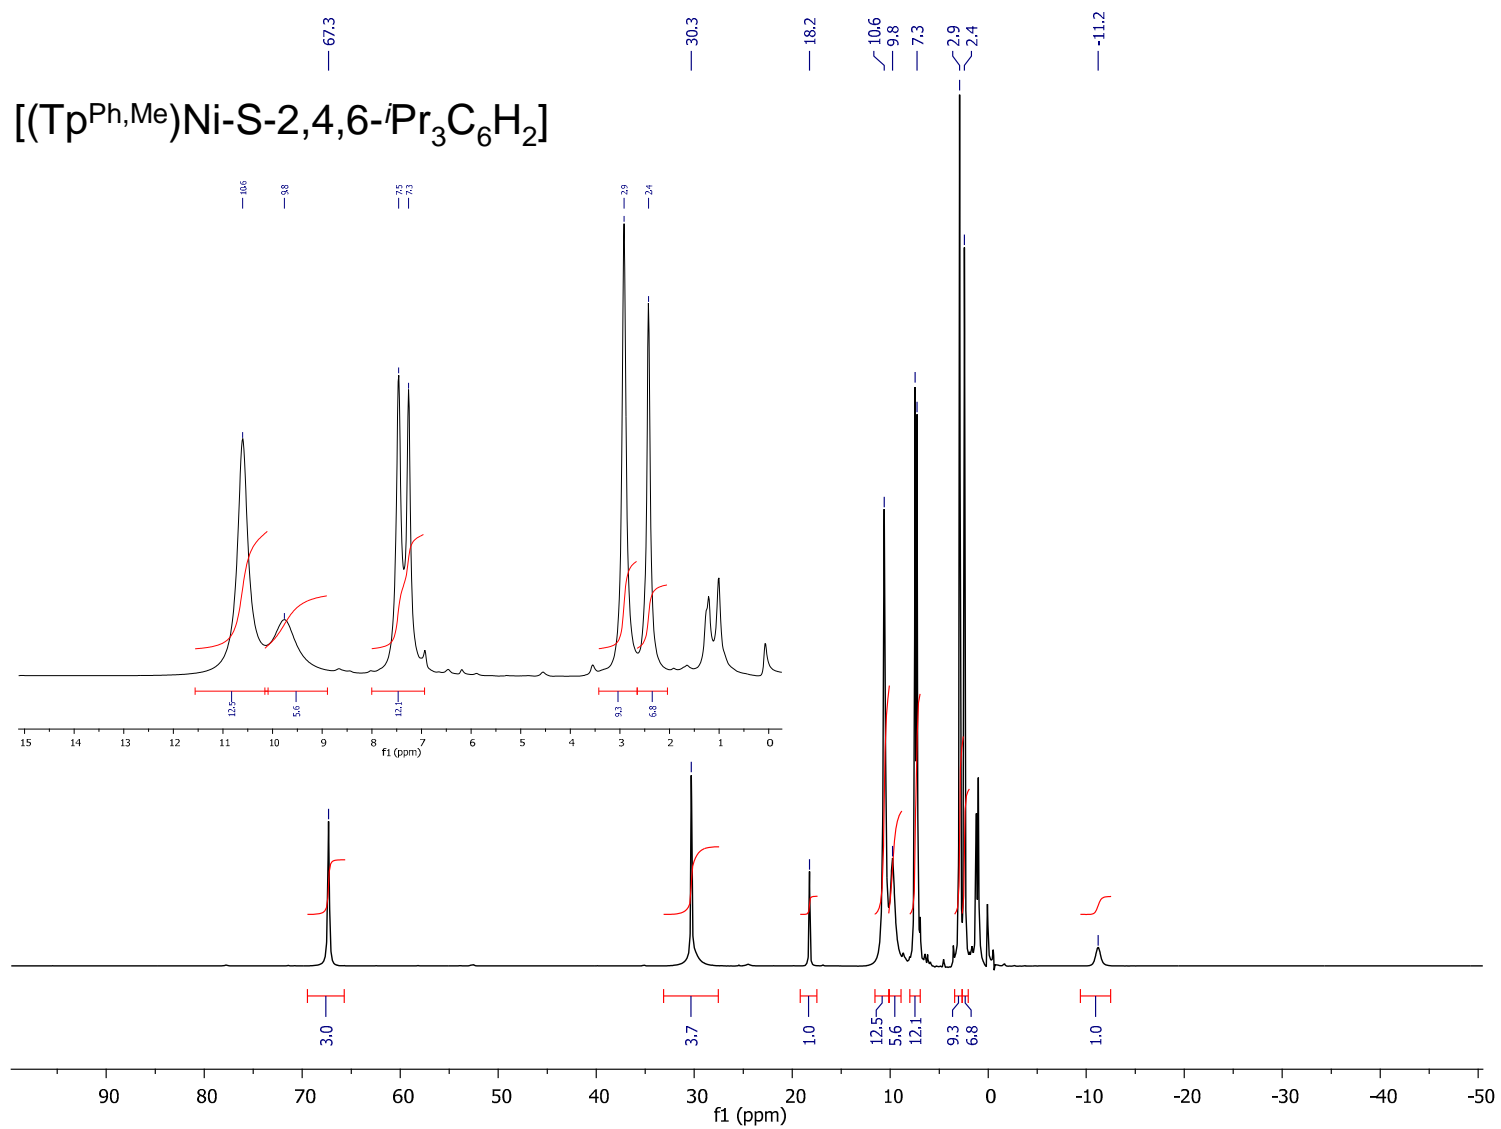

**Figure S6.**  $^1\text{H}$  NMR spectrum (500 MHz, 295 K) of  $[(\text{Tp}^{\text{Ph,Me}})\text{Ni-S-2,4,6-}i\text{Pr}_3\text{C}_6\text{H}_2]$  in  $\text{CDCl}_3$ .

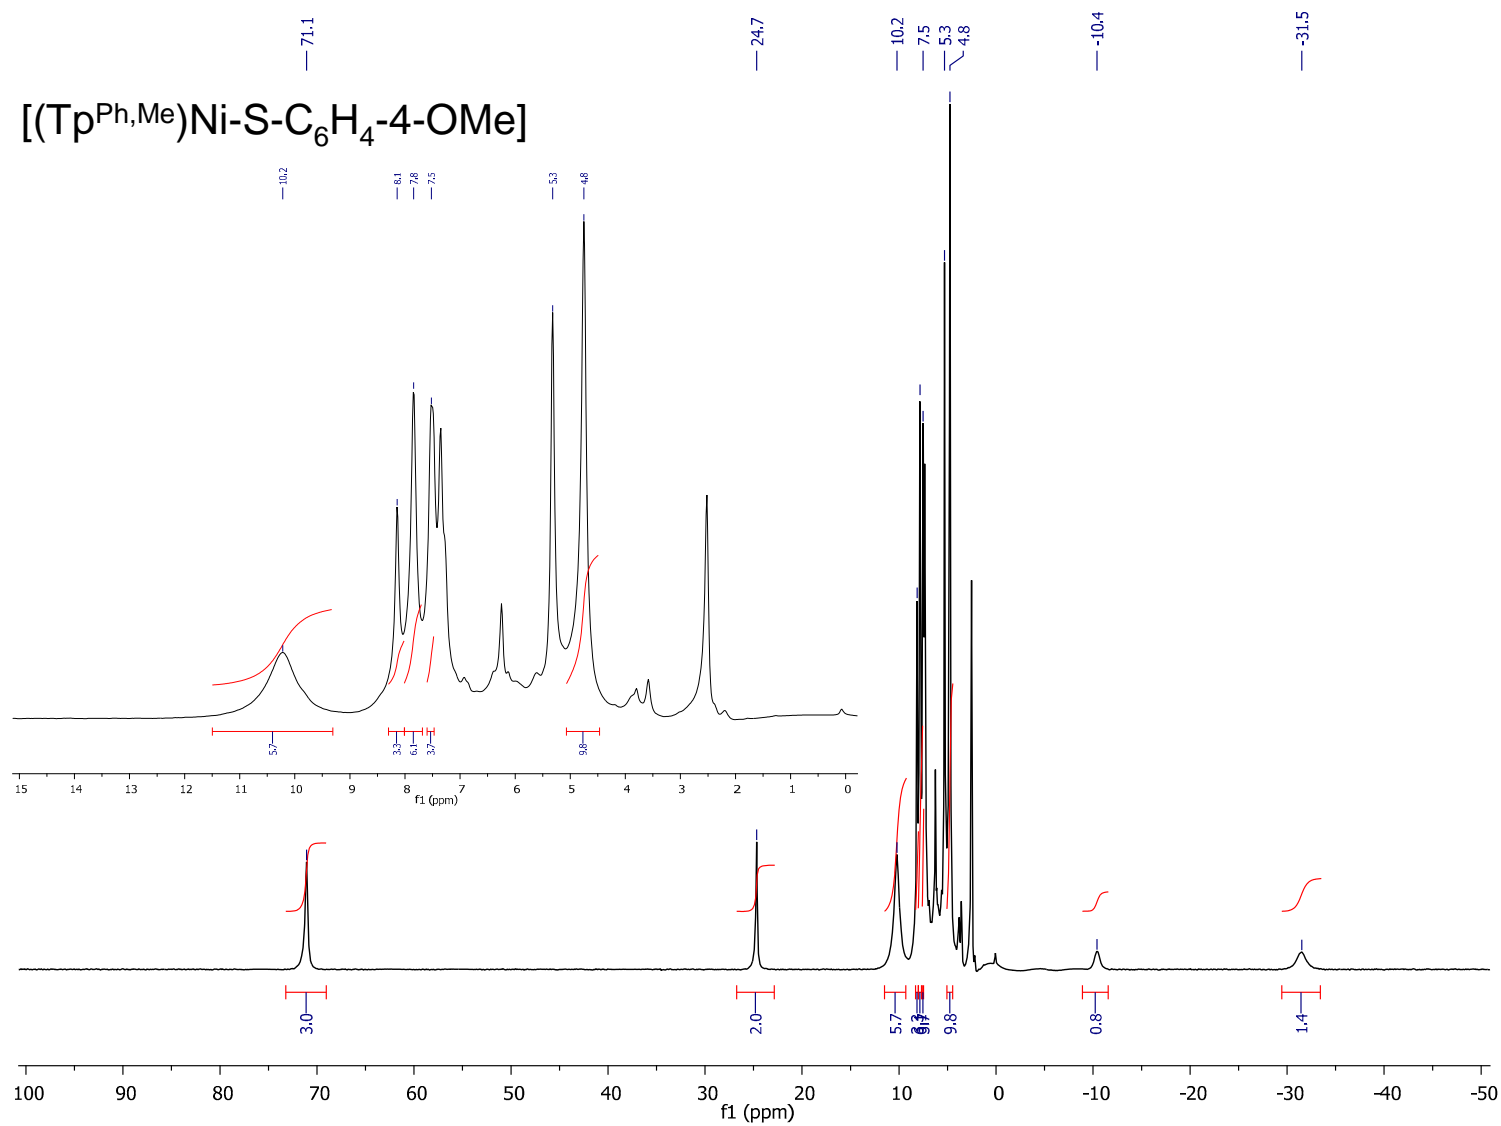

**Figure S7.**  $^1\text{H}$  NMR spectrum (500 MHz, 295 K) of  $[(\text{Tp}^{\text{Ph,Me}})\text{Ni-S-C}_6\text{H}_4\text{-4-OMe}]$  in  $\text{CD}_2\text{Cl}_2$ .

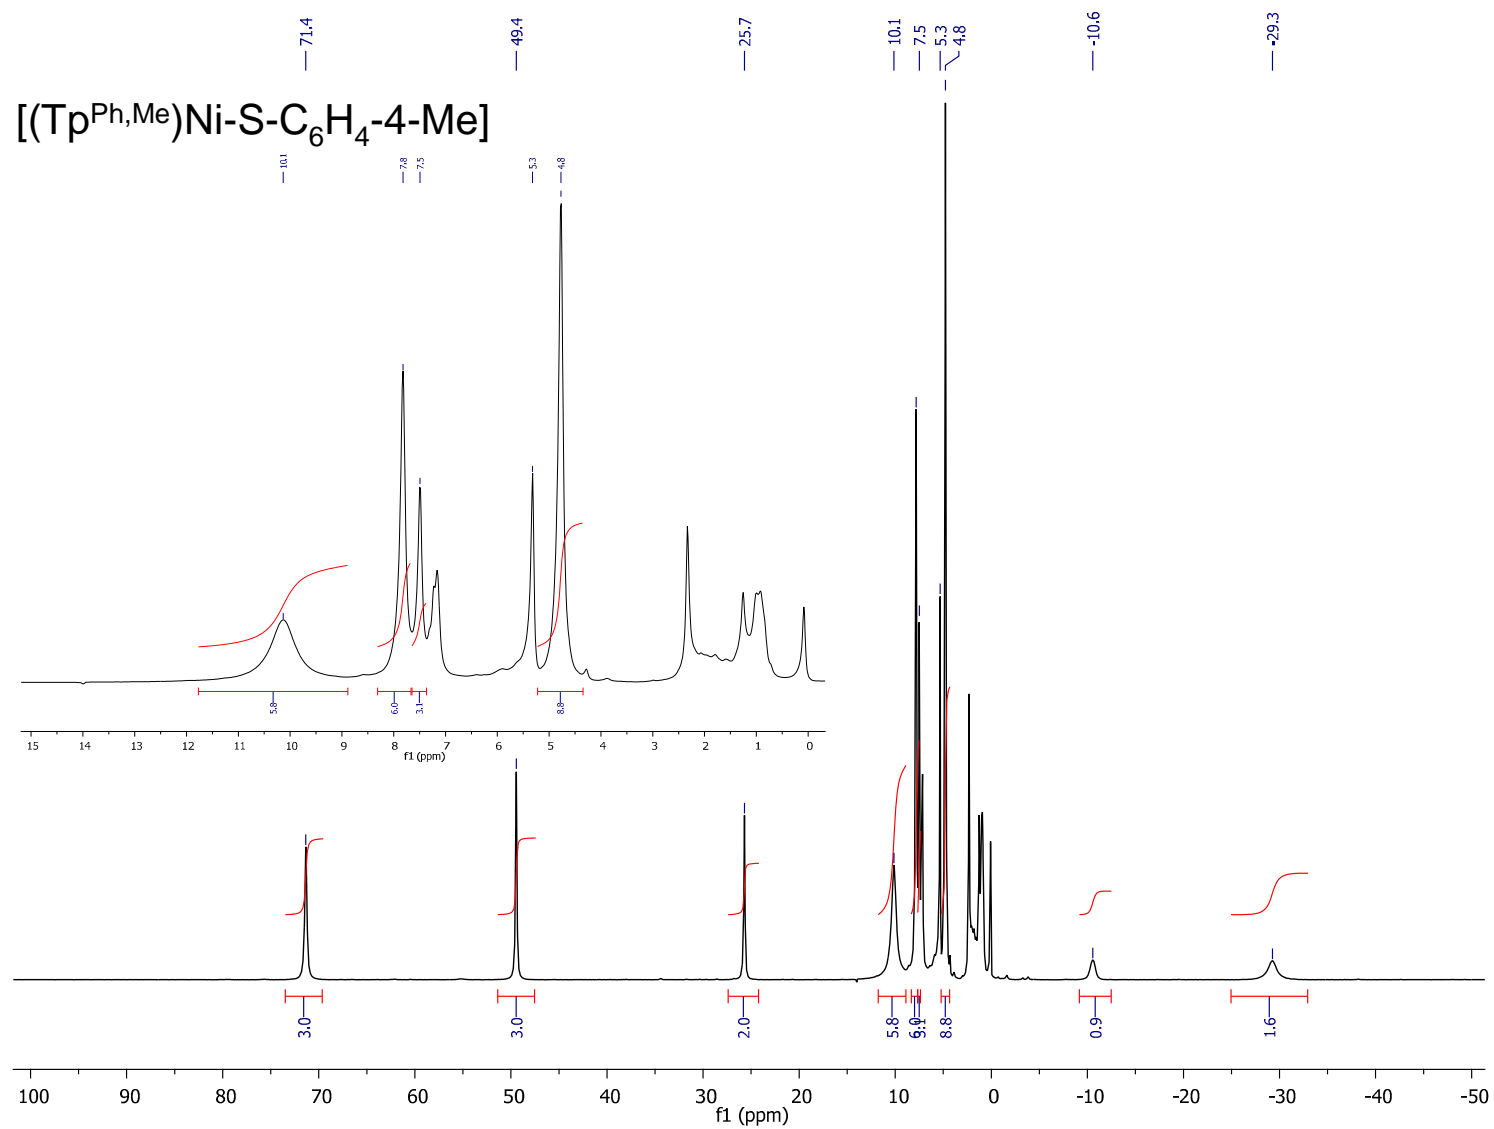

**Figure S8.**  $^1\text{H}$  NMR spectrum (500 MHz, 295 K) of  $[(\text{Tp}^{\text{Ph,Me}})\text{Ni-S-C}_6\text{H}_4\text{-4-Me}]$  in  $\text{CD}_2\text{Cl}_2$ .



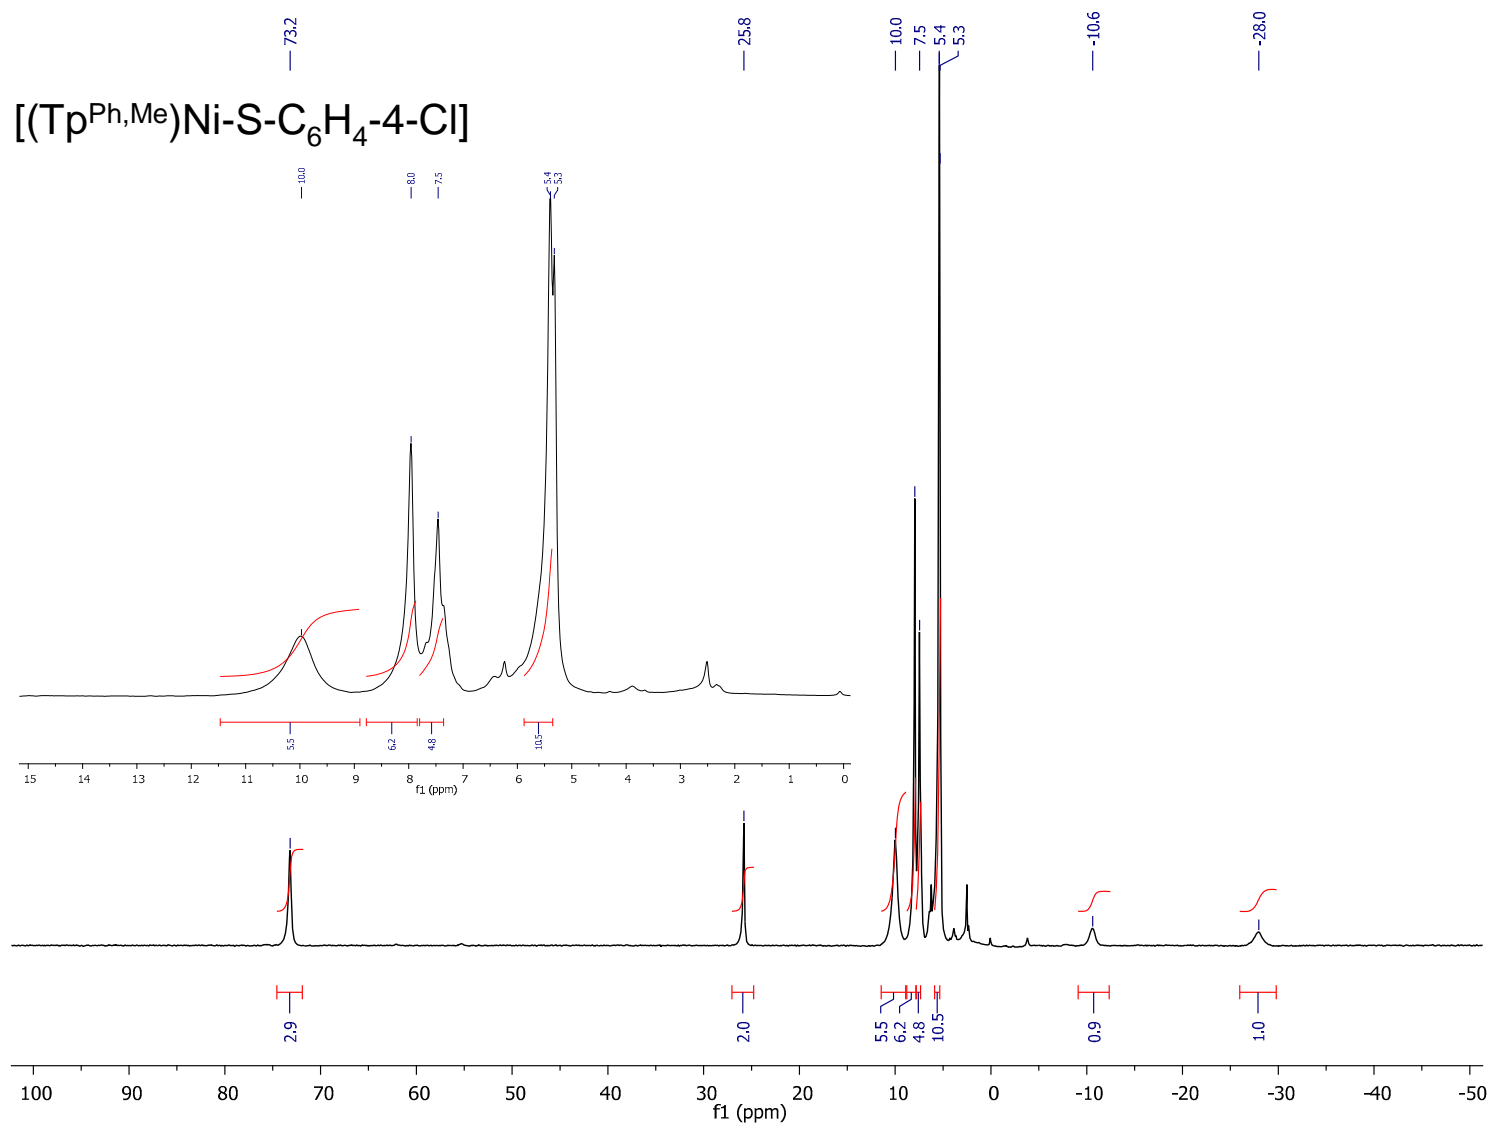

**Figure S9.**  $^1\text{H}$  NMR spectrum (500 MHz, 295 K) of  $[(\text{Tp}^{\text{Ph,Me}})\text{Ni-S-C}_6\text{H}_4\text{-4-Cl}]$  in  $\text{CD}_2\text{Cl}_2$ .

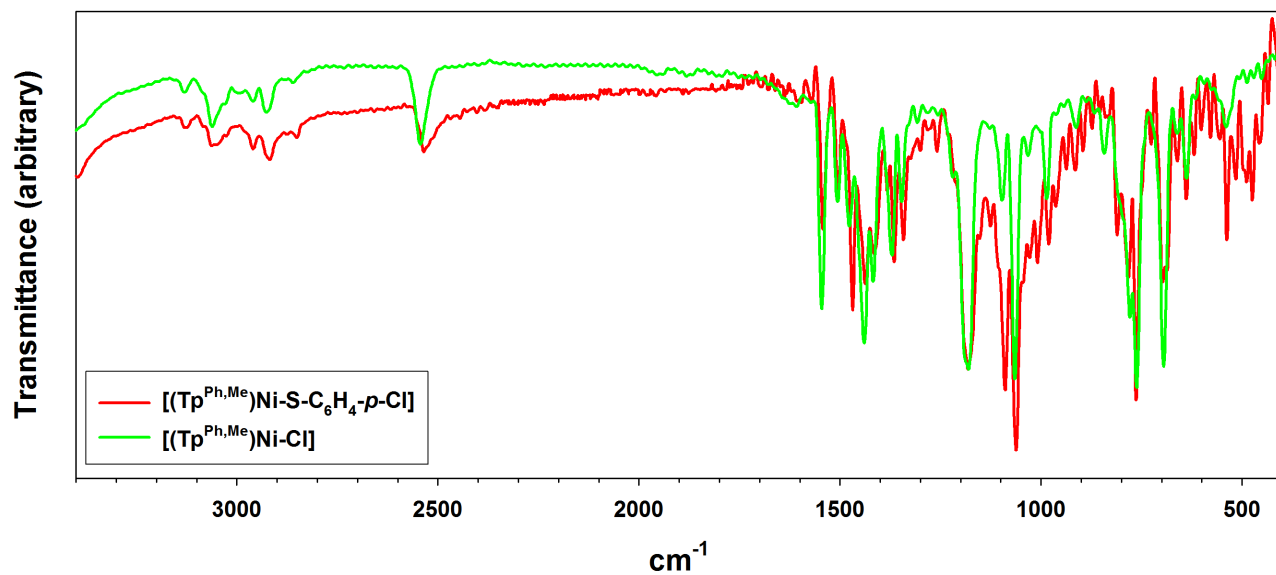

Figure S10. FTIR spectra (KBr pellets) of  $[(\text{Tp}^{\text{Ph,Me}})\text{Ni-S-C}_6\text{H}_4\text{-}4\text{-Cl}]$  (red) and  $[(\text{Tp}^{\text{Ph,Me}})\text{Ni-Cl}]$  (green).

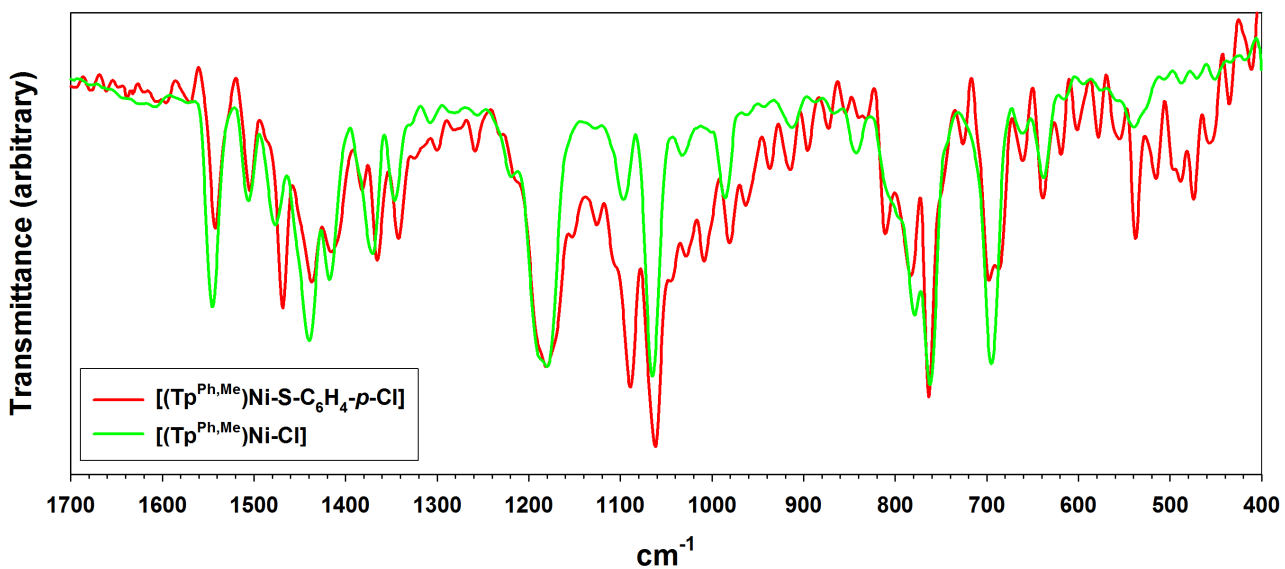

Figure S11. Detail of the FTIR spectra of  $[(\text{Tp}^{\text{Ph,Me}})\text{Ni-S-C}_6\text{H}_4\text{-}4\text{-Cl}]$  (red) and  $[(\text{Tp}^{\text{Ph,Me}})\text{Ni-Cl}]$  (green).

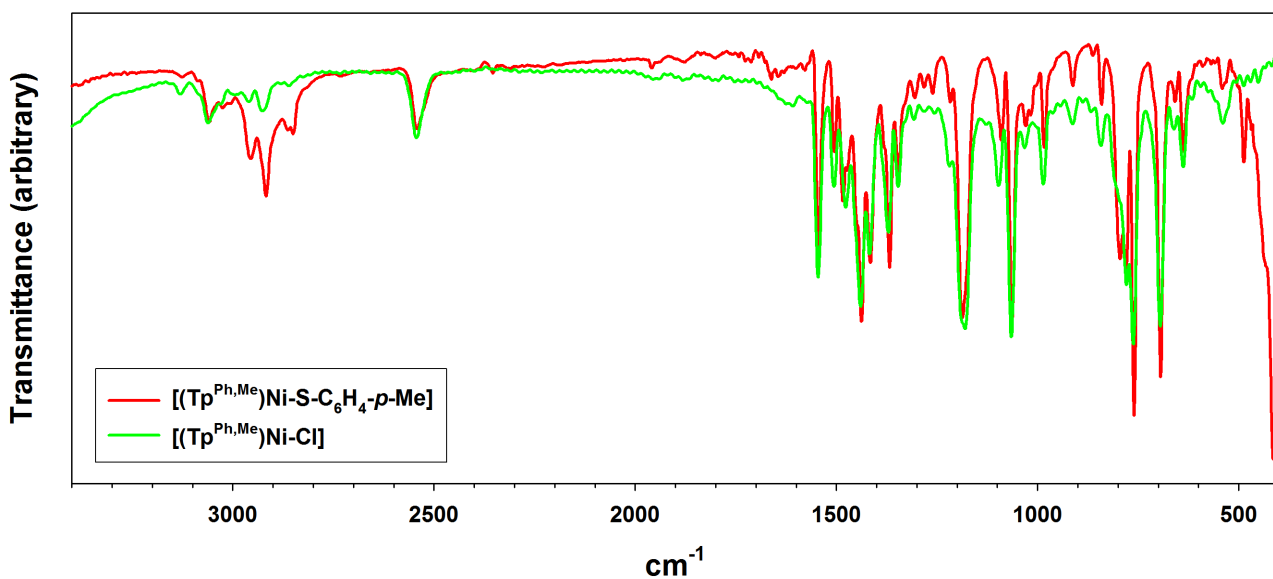

**Figure S12.** FTIR spectra (KBr pellets) of  $[(\text{Tp}^{\text{Ph,Me}})\text{Ni-S-C}_6\text{H}_4\text{-}4\text{-Me}]$  (red) and  $[(\text{Tp}^{\text{Ph,Me}})\text{Ni-Cl}]$  (green).

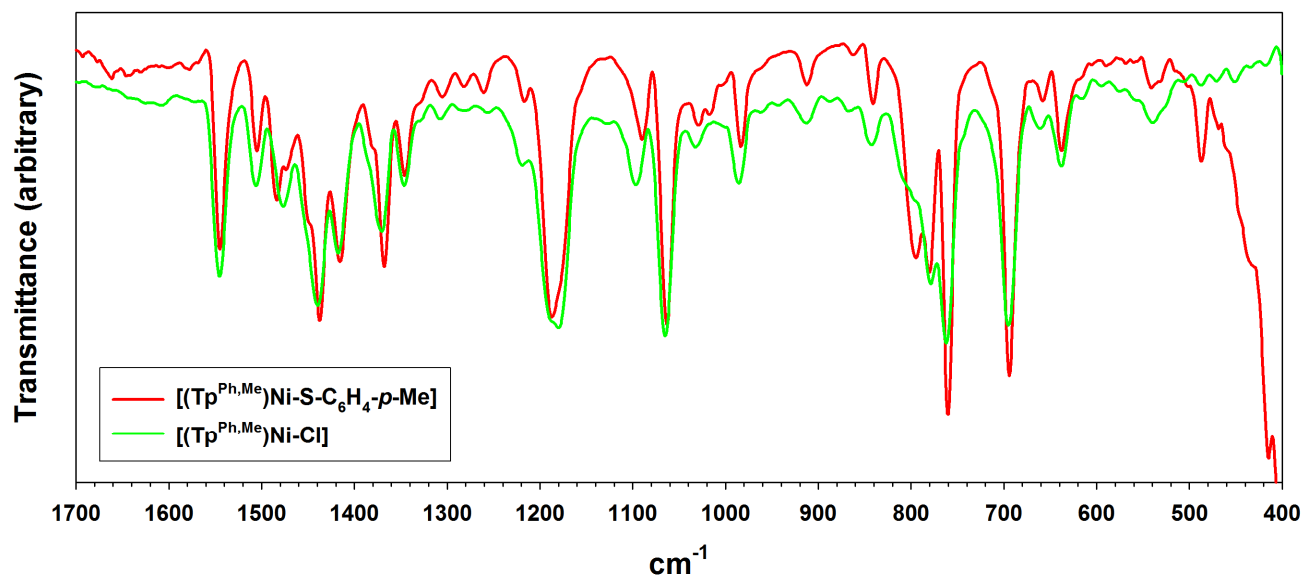

**Figure S13.** Detail of the FTIR spectra of  $[(\text{Tp}^{\text{Ph,Me}})\text{Ni-S-C}_6\text{H}_4\text{-}4\text{-Me}]$  (red) and  $[(\text{Tp}^{\text{Ph,Me}})\text{Ni-Cl}]$  (green).

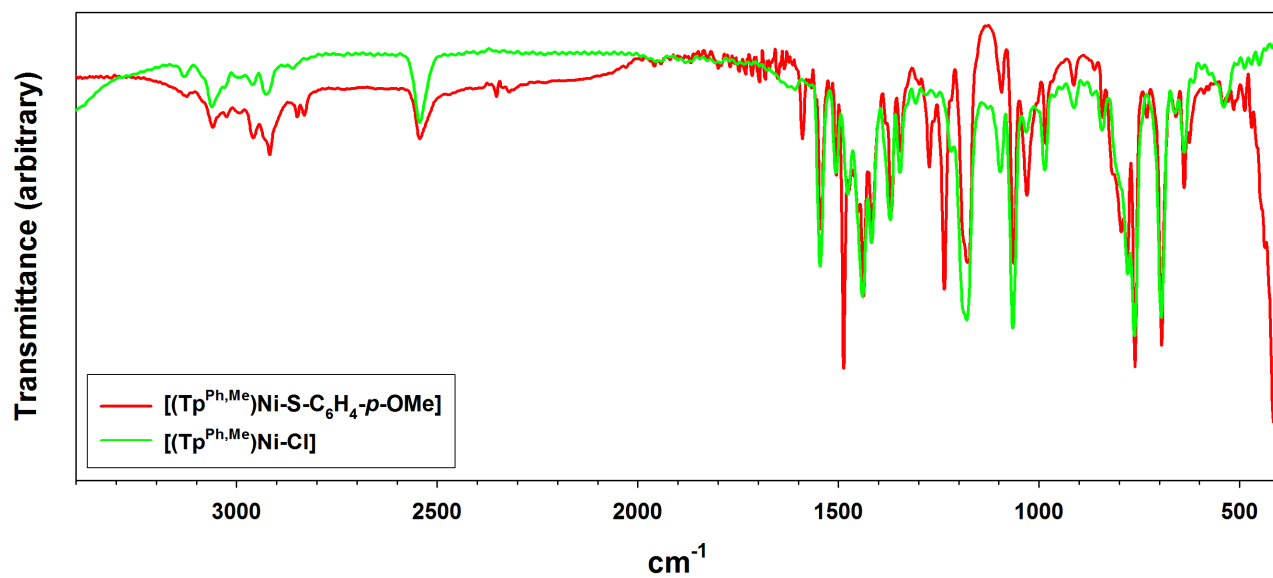

**Figure S14.** FTIR spectra (KBr pellets) of  $[(\text{Tp}^{\text{Ph,Me}})\text{Ni-S-C}_6\text{H}_4\text{-}4\text{-OMe}]$  (red) and  $[(\text{Tp}^{\text{Ph,Me}})\text{Ni-Cl}]$  (green).

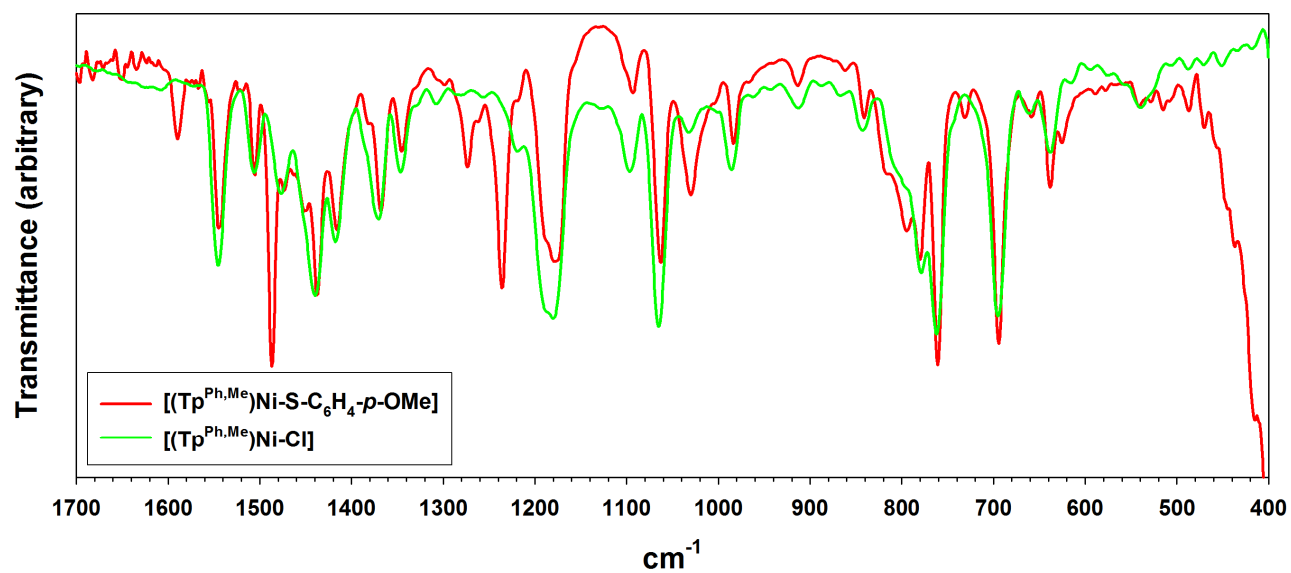

**Figure S15.** Detail of the FTIR spectra of  $[(\text{Tp}^{\text{Ph,Me}})\text{Ni-S-C}_6\text{H}_4\text{-}4\text{-OMe}]$  (red) and  $[(\text{Tp}^{\text{Ph,Me}})\text{Ni-Cl}]$  (green).

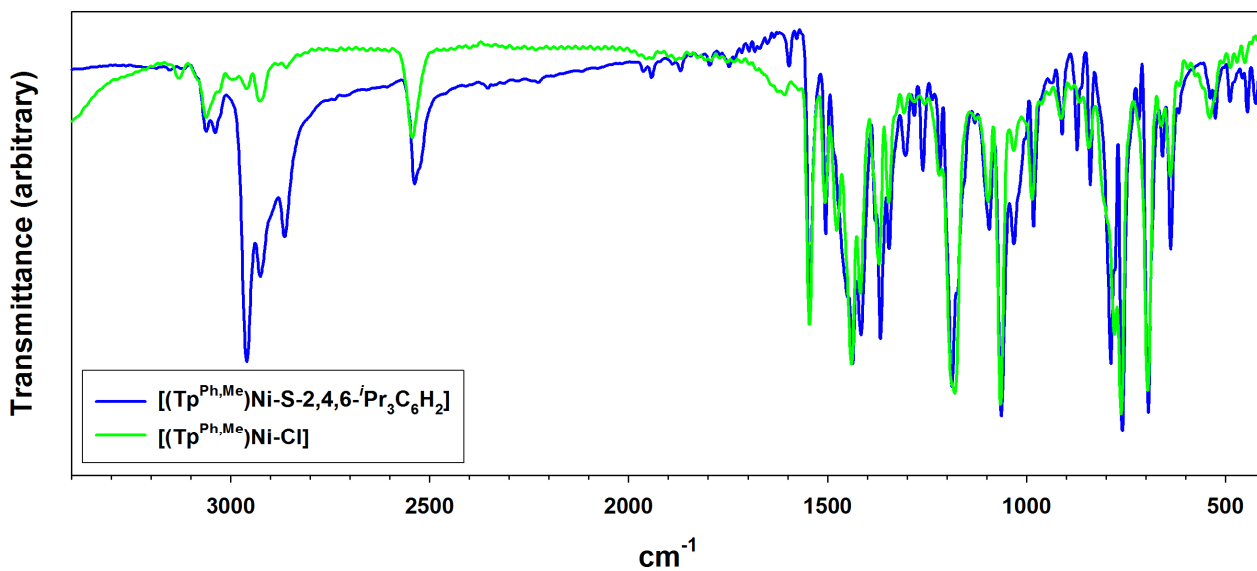

**Figure S16.** FTIR spectra (KBr pellets) of  $[(\text{Tp}^{\text{Ph,Me}})\text{Ni-S-2,4,6-}^i\text{Pr}_3\text{C}_6\text{H}_2]$  (blue) and  $[(\text{Tp}^{\text{Ph,Me}})\text{Ni-Cl}]$  (green).

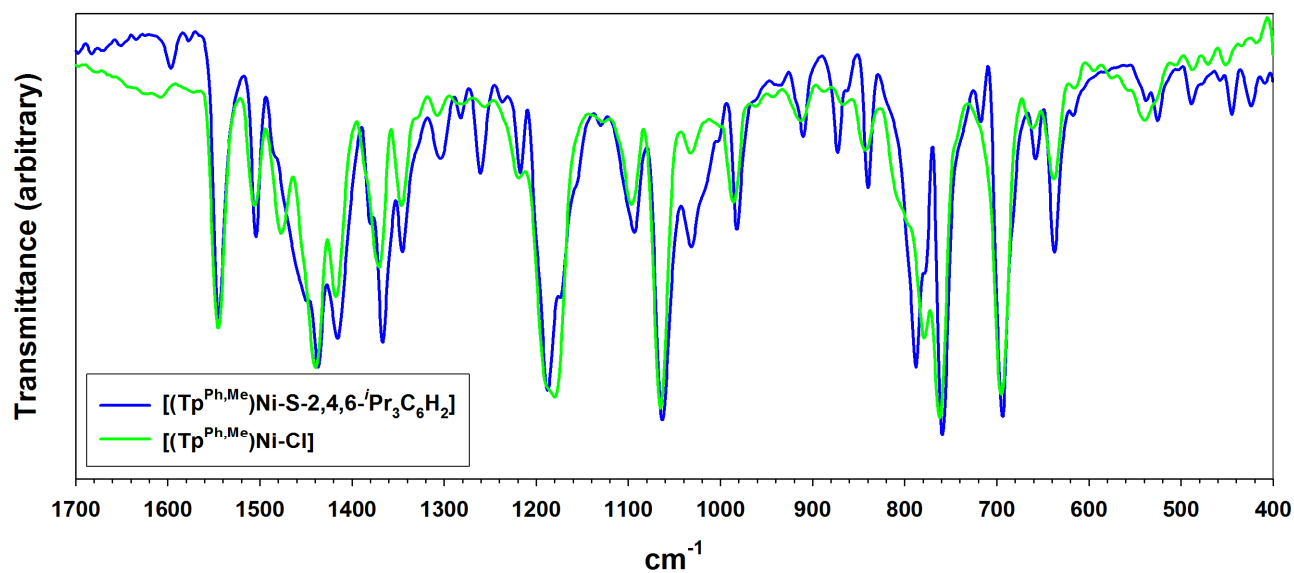

**Figure S17.** Detail of the FTIR spectra of  $[(\text{Tp}^{\text{Ph,Me}})\text{Ni-S-2,4,6-}^i\text{Pr}_3\text{C}_6\text{H}_2]$  (blue) and  $[(\text{Tp}^{\text{Ph,Me}})\text{Ni-Cl}]$  (green).

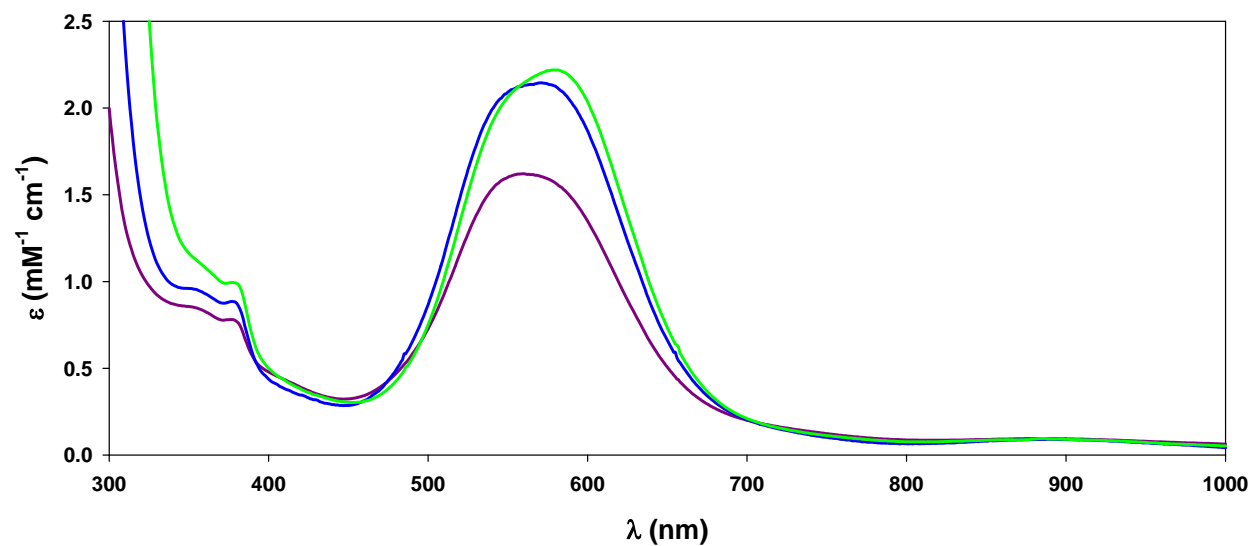

**Figure S18.** UV-Vis-NIR spectra of  $[(\text{Tp}^{\text{Ph,Me}})\text{Ni-S-2,4,6-Me}_3\text{C}_6\text{H}_2]$  at room temperature (295 K) in toluene (green),  $\text{CH}_2\text{Cl}_2$  (blue) and  $\text{CH}_3\text{CN}$  (violet) solutions.

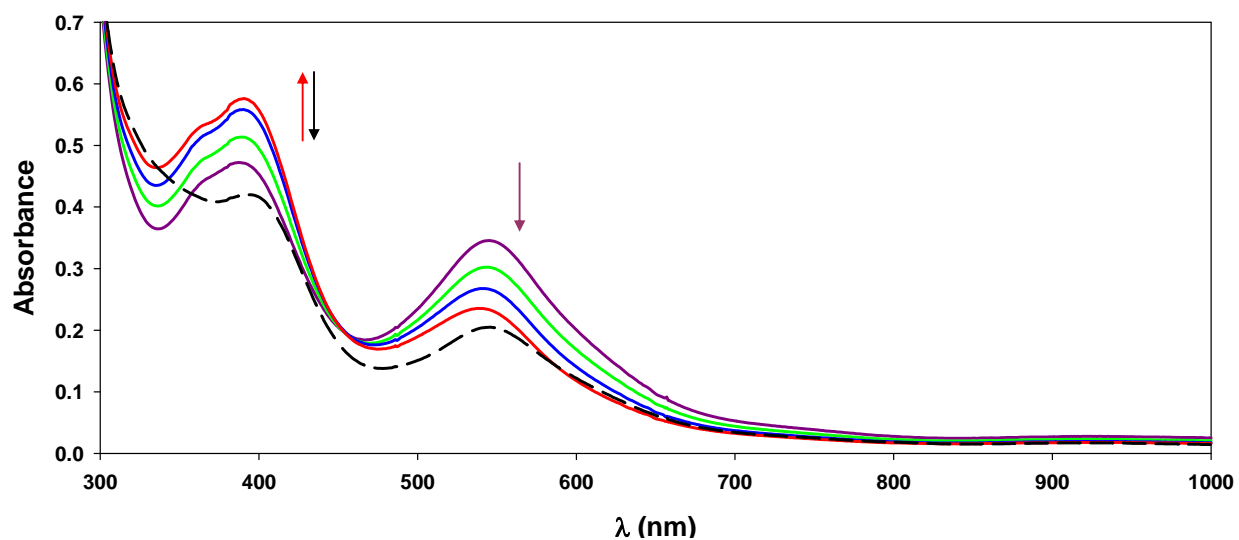

**Figure S19.** Variable temperature UV-Vis-NIR spectra of  $[(\text{Tp}^{\text{Ph,Me}})\text{Ni-S-2,4,6-}^i\text{Pr}_3\text{C}_6\text{H}_2]$  obtained with increased cooling from room temperature in  $\text{CH}_3\text{CN}$ : purple, 298 K; green, 294 K; blue, 286 K; red 278 K. The dashed black spectrum was recorded on subsequent warming to 316 K. Raw data are shown, not corrected for changes in solvent density.

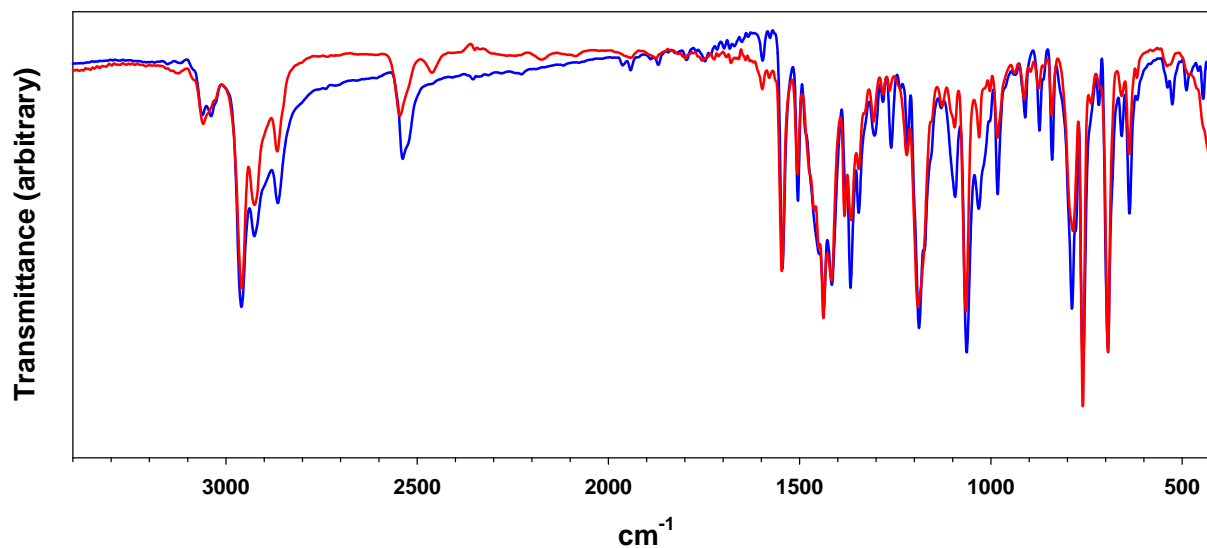

**Figure S20.** FTIR spectra (KBr pellets) of  $[(\kappa^3\text{-Tp}^{\text{Ph,Me}})\text{Ni-S-2,4,6-}i\text{Pr}_3\text{C}_6\text{H}_2]$  recrystallized from  $\text{CH}_2\text{Cl}_2/\text{hexane}$  (blue) and a mixture of  $[(\kappa^3\text{-Tp}^{\text{Ph,Me}})\text{Ni-S-2,4,6-}i\text{Pr}_3\text{C}_6\text{H}_2]$  and  $[(\kappa^2\text{-Tp}^{\text{Ph,Me}})\text{Ni}(\text{NCMe})(\text{S-2,4,6-}i\text{Pr}_3\text{C}_6\text{H}_2)]\cdot\text{MeCN}$  recrystallized from  $\text{CH}_3\text{CN}$  (red).

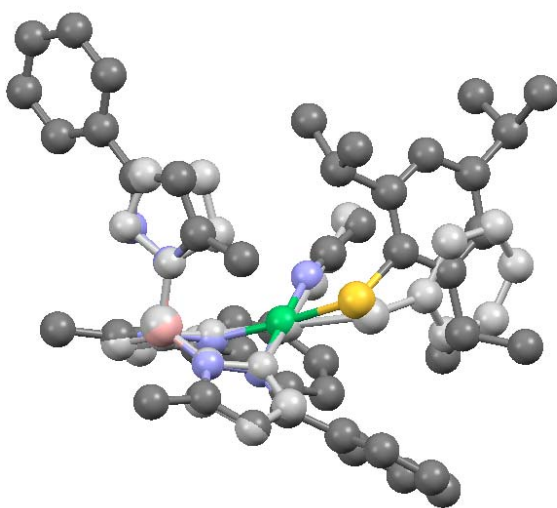

**Figure S21.** Least-squares overlay of the theoretical  $[(\kappa^2\text{-Tp})\text{Ni}(\text{NCMe})(\text{SPh})]$  model (gray) with the experimental  $[(\kappa^2\text{-Tp}^{\text{Ph,Me}})\text{Ni}(\text{NCMe})(\text{S-2,4,6-}i\text{Pr}_3\text{C}_6\text{H}_2)]$  X-ray structure (color), aligned on a common basal  $\text{BN}_3$  moiety. Hydrogen atoms are omitted for clarity.

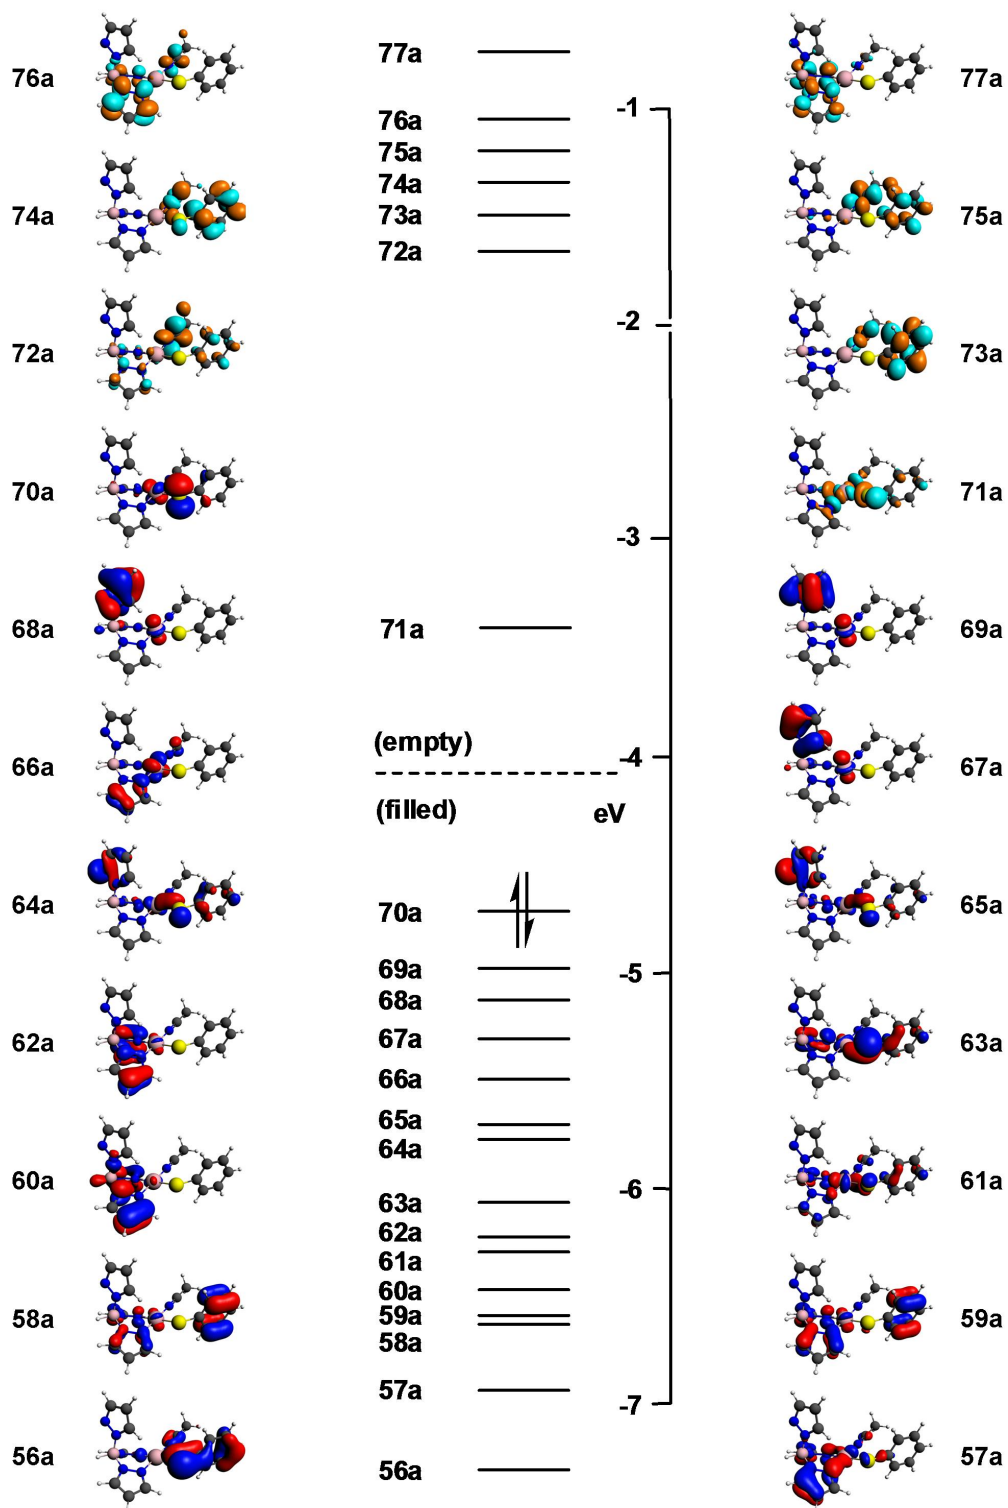

Figure S22. Frontier molecular orbitals for the  $[(k^2\text{-Tp})\text{Ni}(\text{NCMe})(\text{SPh})]$  model (see Figure S21).



**Table S1.** Coordinates for minimized structure of [(k<sup>2</sup>-Tp)Ni(NCMe)(SPh)].

|    | x           | y           | z           | (Å) |
|----|-------------|-------------|-------------|-----|
| Ni | 0.06122635  | 0.04588338  | 0.06487979  |     |
| B  | 2.76893645  | -1.69213365 | -0.59747702 |     |
| H  | 3.52403892  | -2.44873163 | -1.14658764 |     |
| N  | 2.31456025  | -0.62377946 | -1.62548276 |     |
| N  | 1.21127953  | 0.17404010  | -1.47020882 |     |
| H  | 3.76893866  | -0.90216655 | -3.13220990 |     |
| C  | 2.87850946  | -0.36329143 | -2.82805367 |     |
| C  | 2.13623094  | 0.62060750  | -3.47252421 |     |
| H  | 2.31617368  | 1.05168599  | -4.45090106 |     |
| C  | 1.09709760  | 0.92516206  | -2.58526906 |     |
| H  | 0.28443444  | 1.63740359  | -2.66979758 |     |
| N  | 1.49726875  | -2.50453775 | -0.20100405 |     |
| N  | 0.31948775  | -1.90542667 | 0.12228405  |     |
| H  | 2.21371777  | -4.49162811 | -0.27847548 |     |
| C  | 1.36655715  | -3.84523973 | -0.07990942 |     |
| C  | 0.06511799  | -4.13324240 | 0.32477086  |     |
| H  | -0.37106661 | -5.10904084 | 0.50889256  |     |
| C  | -0.55510133 | -2.88180951 | 0.43725324  |     |
| H  | -1.57479765 | -2.63504401 | 0.71013001  |     |
| N  | 3.44224546  | -1.05359403 | 0.62430722  |     |
| N  | 4.17202553  | -1.86764312 | 1.44850798  |     |
| H  | 2.85869438  | 1.01164224  | 0.59467469  |     |
| C  | 3.39284550  | 0.22143098  | 1.11293293  |     |
| C  | 4.11833184  | 0.24931573  | 2.29608536  |     |
| H  | 4.29724467  | 1.10857592  | 2.93538287  |     |
| C  | 4.57500207  | -1.07861296 | 2.45415920  |     |
| H  | 5.18855439  | -1.49640284 | 3.24889738  |     |
| S  | -0.16676413 | 2.28509939  | -0.05928102 |     |
| C  | -1.58692984 | 2.84671014  | 0.86315136  |     |
| C  | -2.90060205 | 2.60654640  | 0.41383875  |     |
| C  | -3.99688094 | 3.12351713  | 1.10791706  |     |
| H  | -5.00750628 | 2.93219474  | 0.74198667  |     |
| C  | -3.80207119 | 3.90351747  | 2.25522698  |     |
| C  | -2.50071039 | 4.15760893  | 2.70369931  |     |
| H  | -2.33814960 | 4.77323522  | 3.59030093  |     |
| C  | -1.40171835 | 3.62727810  | 2.02011241  |     |
| H  | -3.04940414 | 2.01621284  | -0.49163641 |     |
| H  | -4.65866522 | 4.32006755  | 2.78832554  |     |
| H  | -0.38615106 | 3.81879875  | 2.37016982  |     |
| N  | -1.03416248 | -0.02492269 | 1.54791722  |     |
| C  | -1.66694177 | -0.03268866 | 2.52076903  |     |
| C  | -2.47240232 | -0.02626339 | 3.72736872  |     |
| H  | -3.21881832 | -0.83171690 | 3.69286275  |     |
| H  | -2.98808148 | 0.94102782  | 3.81367854  |     |
| H  | -1.83086994 | -0.17298850 | 4.60724466  |     |

**Table S2.** Calculated excitations (TD-DFT) for [(k<sup>2</sup>-Tp)Ni(NCMe)(SPh)] model.

| no. | E/eV   | f/AU     | Occupied to<br>virtual orbitals                  | Contribution(%)                      |
|-----|--------|----------|--------------------------------------------------|--------------------------------------|
| 1   | 1.5326 | 0.002044 | 70a → 71a<br>69a → 71a                           | 0.7373<br>0.1657                     |
| 2   | 1.5990 | 0.001799 | 69a → 71a<br>68a → 71a<br>70a → 71a              | 0.4660<br>0.2741<br>0.2378           |
| 3   | 1.7486 | 0.000967 | 67a → 71a<br>68a → 71a<br>69a → 71a              | 0.4627<br>0.4199<br>0.1092           |
| 4   | 2.2887 | 0.000217 | 65a → 71a<br>64a → 71a                           | 0.6882<br>0.3088                     |
| 5   | 2.2916 | 0.001272 | 67a → 71a<br>69a → 71a<br>68a → 71a              | 0.4997<br>0.2470<br>0.2321           |
| 6   | 2.3956 | 0.003823 | 66a → 71a                                        | 0.9103                               |
| 7   | 2.6000 | 0.009209 | 64a → 71a<br>63a → 71a<br>65a → 71a              | 0.4185<br>0.2780<br>0.1995           |
| 8   | 2.8195 | 0.003812 | 62a → 71a                                        | 0.9041                               |
| 9   | 2.8966 | 0.021493 | 63a → 71a<br>61a → 71a<br>64a → 71a              | 0.3659<br>0.2989<br>0.1321           |
| 10  | 3.0156 | 0.003505 | 60a → 71a                                        | 0.8859                               |
| 11  | 3.0934 | 0.001358 | 70a → 72a<br>61a → 71a                           | 0.6793<br>0.2309                     |
| 12  | 3.1665 | 0.002089 | 58a → 71a<br>59a → 71a                           | 0.5308<br>0.3388                     |
| 13  | 3.2226 | 0.079702 | 59a → 71a<br>70a → 73a<br>61a → 71a<br>70a → 72a | 0.3153<br>0.2193<br>0.1337<br>0.1121 |
| 14  | 3.2574 | 0.066696 | 70a → 73a<br>61a → 71a                           | 0.6512<br>0.0976                     |
| 15  | 3.3159 | 0.065843 | 58a → 71a<br>59a → 71a<br>61a → 71a<br>63a → 71a | 0.3048<br>0.2278<br>0.1223<br>0.1043 |

| no. | E/eV   | f/AU     | Occupied to<br>virtual orbitals     | Contribution(%)            |
|-----|--------|----------|-------------------------------------|----------------------------|
| 16  | 3.3275 | 0.011992 | 69a → 72a                           | 0.8759                     |
| 17  | 3.4247 | 0.002000 | 70a → 74a                           | 0.8698                     |
| 18  | 3.4642 | 0.000664 | 69a → 73a<br>68a → 72a              | 0.5509<br>0.4261           |
| 19  | 3.4716 | 0.002927 | 68a → 72a<br>69a → 73a              | 0.5135<br>0.4386           |
| 20  | 3.5074 | 0.018594 | 70a → 75a                           | 0.8693                     |
| 21  | 3.6030 | 0.009664 | 57a → 71a                           | 0.9112                     |
| 22  | 3.6136 | 0.000331 | 68a → 73a                           | 0.9678                     |
| 23  | 3.6254 | 0.000411 | 69a → 74a                           | 0.9217                     |
| 24  | 3.6519 | 0.000115 | 67a → 72a                           | 0.9285                     |
| 25  | 3.6599 | 0.004569 | 70a → 76a                           | 0.9269                     |
| 26  | 3.7189 | 0.000773 | 69a → 75a                           | 0.9615                     |
| 27  | 3.7683 | 0.001302 | 68a → 74a                           | 0.9649                     |
| 28  | 3.7905 | 0.000161 | 67a → 73a                           | 0.9798                     |
| 29  | 3.8612 | 0.000946 | 68a → 75a                           | 0.9598                     |
| 30  | 3.8764 | 0.000395 | 69a → 76a                           | 0.9481                     |
| 31  | 3.9258 | 0.016394 | 66a → 73a<br>66a → 72a              | 0.4733<br>0.4638           |
| 32  | 3.9456 | 0.000247 | 67a → 74a                           | 0.9708                     |
| 33  | 4.0111 | 0.030450 | 70a → 77a<br>66a → 73a<br>66a → 72a | 0.3775<br>0.2924<br>0.1323 |
| 34  | 4.0279 | 0.000719 | 68a → 76a                           | 0.8520                     |
| 35  | 4.0384 | 0.008686 | 67a → 75a<br>70a → 77a              | 0.6159<br>0.1640           |
| 36  | 4.0428 | 0.014569 | 67a → 75a<br>70a → 77a              | 0.3491<br>0.2655           |
| 37  | 4.0727 | 0.000424 | 65a → 72a<br>64a → 72a              | 0.7958<br>0.1546           |
| 38  | 4.1105 | 0.001950 | 70a → 78a                           | 0.9061                     |

| no. | E/eV   | f/AU     | Occupied to<br>virtual orbitals     | Contribution(%)            |
|-----|--------|----------|-------------------------------------|----------------------------|
| 39  | 4.1370 | 0.057805 | 56a → 71a<br>66a → 74a<br>64a → 72a | 0.4440<br>0.2087<br>0.1008 |
| 40  | 4.1631 | 0.007740 | 64a → 72a<br>66a → 74a              | 0.6069<br>0.1786           |
| 41  | 4.2007 | 0.011276 | 67a → 76a                           | 0.8362                     |
| 42  | 4.2248 | 0.015310 | 66a → 75a                           | 0.7896                     |
| 43  | 4.2369 | 0.000715 | 65a → 73a<br>64a → 73a              | 0.8258<br>0.1490           |
| 44  | 4.2480 | 0.059177 | 69a → 77a<br>66a → 74a<br>56a → 71a | 0.2270<br>0.2034<br>0.1014 |
| 45  | 4.2501 | 0.012447 | 69a → 77a<br>66a → 75a              | 0.7291<br>0.0994           |
| 46  | 4.3424 | 0.008714 | 64a → 73a<br>63a → 72a              | 0.6736<br>0.1222           |
| 47  | 4.3567 | 0.000314 | 69a → 78a                           | 0.9666                     |
| 48  | 4.3811 | 0.003717 | 55a → 71a<br>65a → 74a              | 0.6180<br>0.2906           |
| 49  | 4.3841 | 0.001351 | 65a → 74a<br>55a → 71a<br>64a → 74a | 0.4484<br>0.3363<br>0.1628 |
| 50  | 4.4055 | 0.009455 | 68a → 77a                           | 0.9341                     |
